# Supplementary material
Source: PubMed Central journal article supplement (PMC4109758)
Supplement: supp_M044198_jlr.M044198-1.pdf [file supp_M044198_jlr.M044198-1.pdf]

## **Supplementary data**

### **Methods**

#### **Safety evaluation in animals.**

Male and female ICR mice weighing 18-20 g were purchased from the Institute of Laboratory Animal Science (Beijing, China). The mice were randomly divided into 3 groups with four mice each (2 male plus 2 female per dose level). The three groups of mice received RUT once intragastrically at 0 (1% CMC-Na as control), 500, or 1000 mg/kg, respectively. Body weight and survival were monitored. Seven days later, animals were sacrificed. Blood samples were taken for liver and kidney function examination. Alanine aminotransferase (ALT), aspartate aminotransferase (AST), blood urea nitrogen (BUN) and creatinine (CRE) levels were assayed using commercially available kits (Biosino bio-technology & science inc.). The livers, kidneys, and hearts were fixed in 10% formaldehyde at room temperature for histological examination using H&E staining.

For acute toxicity tests, ICR mice were intragastrically given RUT once in a single-dosing experiment at 0, 500, 1000, or 2000 mg/kg, and monitored for 7 days.

Plasma ALT and AST levels were also measured in ApoE<sup>-/-</sup> mice on HFD treated with or without RUT (20 mg/kg) after 8 weeks using the above kits (Biosino bio-technology & science inc.).

#### **FRET LXR $\alpha$ / $\beta$ coregulator peptide interaction assay**





**Figure 1**

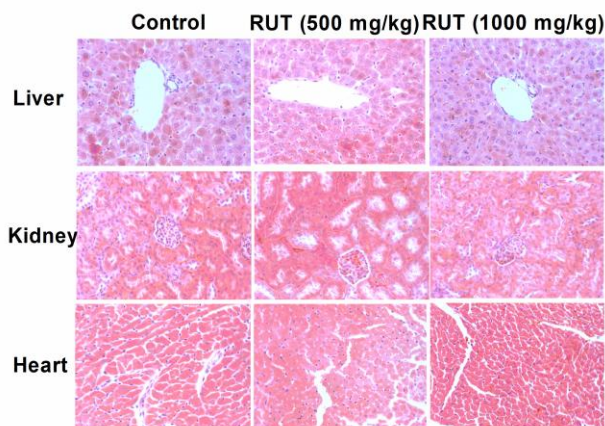

Figure 1. Safety evaluation of RUT in ICR mice

ICR mice were divided into 3 groups with four mice each. They were untreated or orally treated with RUT at 0, 500, or 1000 mg/kg in single-dose. Seven days later, blood samples were taken for liver and kidney function examination. Animal organs were taken as well for histological examination using H&E staining (400×). RUT treatment didn't cause morphology change in liver, heart and kidney tissues of the ICR mice.

## Figure 2

A

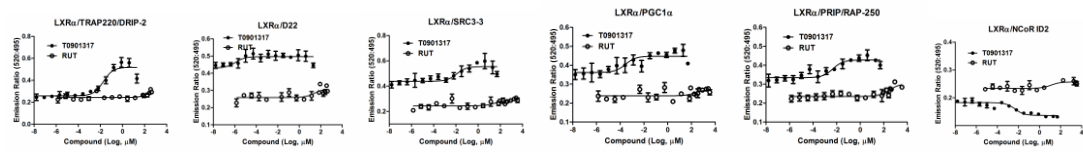

B

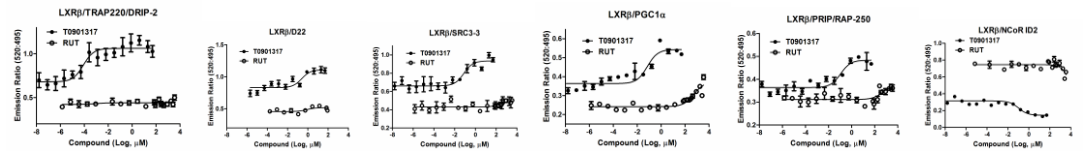

Figure 2. TR-FRET assay.

(A-B) TR-FRET assay was used to examine corepressor peptide displacement from or coactivator recruitment to human LXR $\alpha$  (A) or LXR $\beta$  (B) LBD in response to T0901317 or RUT. The data were calculated as the ratio of 520 nm/495 nm. Figures are representative of at least two independent experiments.



Table 1. Effect of RUT on liver and kidney functions in ICR mice with or without RUT treatment.

**Table 1.** Effect of RUT on liver and kidney functions of the subgroup of mice with or without RUT treatment in ICR mice.

|                        | n | AST (U/L)          | ALT (U/L)        | BUN (mM/L)      | Cre ( $\mu$ M/L)  |
|------------------------|---|--------------------|------------------|-----------------|-------------------|
| Control group          | 4 | 75.33 $\pm$ 3.30   | 23.25 $\pm$ 2.28 | 5.88 $\pm$ 0.58 | 47.43 $\pm$ 12.56 |
| RUT group (500 mg/kg)  | 4 | 91.67 $\pm$ 16.50  | 28.50 $\pm$ 7.76 | 6.00 $\pm$ 0.62 | 43.62 $\pm$ 7.76  |
| RUT group (1000 mg/kg) | 4 | 102.75 $\pm$ 11.28 | 27.25 $\pm$ 5.72 | 6.45 $\pm$ 0.47 | 39.22 $\pm$ 3.69  |

**Table 2** Effect of RUT on liver functions of the subgroup of mice with or without RUT treatment in ApoE<sup>-/-</sup> mice.

|                      | n | AST (U/L)   | ALT (U/L)  |
|----------------------|---|-------------|------------|
| Control group        | 6 | 98.50±5.72  | 34.75±2.86 |
| Model group          | 6 | 105.67±9.57 | 32.75±5.40 |
| RUT group (20 mg/kg) | 6 | 89.67±6.60  | 32.00±9.80 |
